# Supplementary material for: CD8+ T cells specific for the islet autoantigen IGRP are restricted in their T cell receptor chain usage
Source: PubMed Central journal article supplement (PMC5353542; doi:10.1038/srep44661), 2017-03-16
Supplement: srep44661-s1.pdf [file srep44661-s1.pdf]

## **Online Supplementary Information**

### **CD8<sup>+</sup> T cells specific for the islet autoantigen IGRP are restricted in their T cell receptor chain usage**

Yannick F. Fuchs, Anne Eugster, Sevina Dietz, Christian Sebelefsky, Denise Kühn, Carmen Wilhelm, Annett Lindner, Anita Gavrigan, Jan Knoop, Andreas Dahl, Anette-G. Ziegler and Ezio Bonifacio

Supplementary Figures:

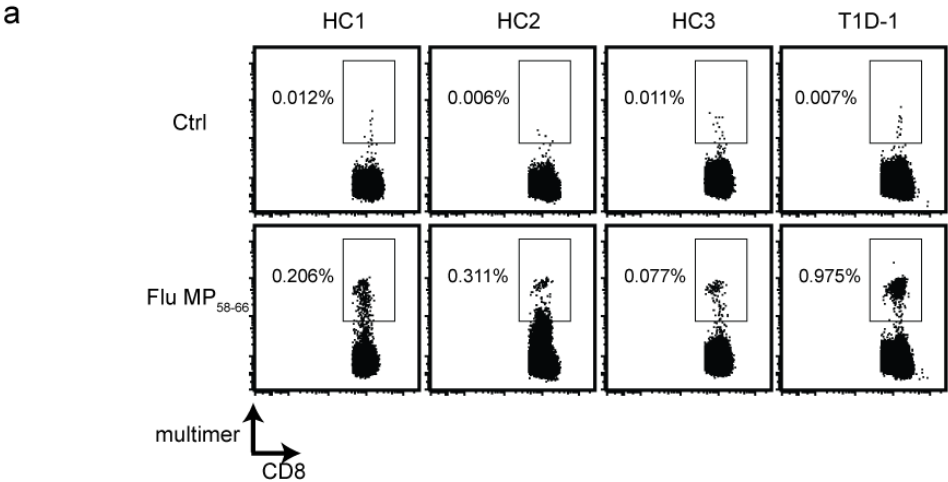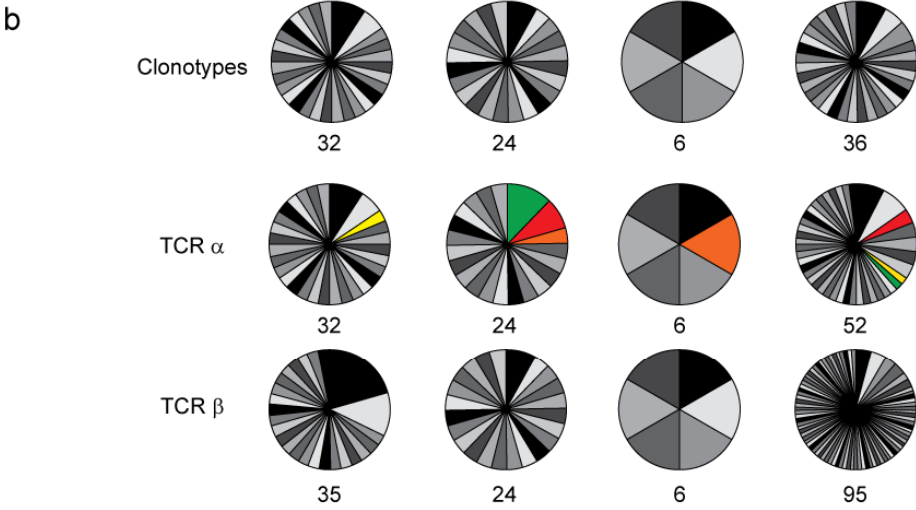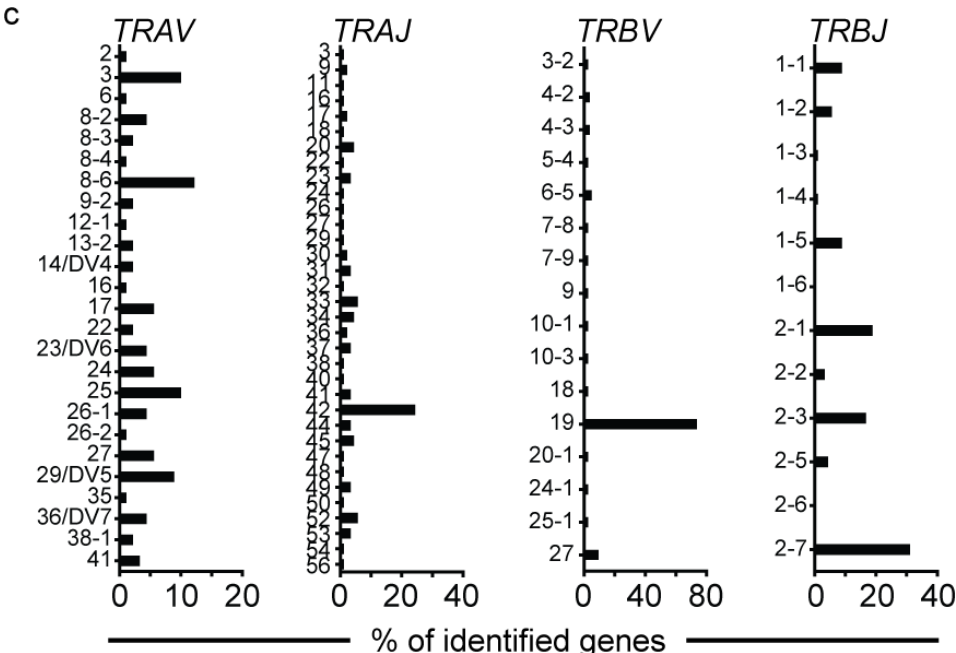

**Supplementary Fig. S1: Identification and TCR repertoire analysis of Flu MP<sub>58-66</sub>-specific CD8<sup>+</sup> T cells.** (a) Representative FACS plots of PBMC samples of 3 healthy and one donor with long standing type 1 diabetes (T1D-1) stained with HLA-A2 multimers loaded with control peptide (HLA-A2<sub>140-149</sub>; top row) or Flu MP<sub>58-66</sub> (bottom row). Cells are gated on CD8 and 10<sup>5</sup> CD8<sup>+</sup> T cells are depicted in each plot. (b) TCR repertoire analysis upon TCR  $\alpha$ - and TCR  $\beta$ -chain sequencing of Flu MP<sub>58-66</sub> specific CD8<sup>+</sup> T cells isolated as single cells from samples shown in A. Pieces of pie charts represent cells with the same TCR  $\alpha$ -/TCR  $\beta$ -chain combination (clonotypes; upper row), TCR  $\alpha$ -chain (middle row) or TCR  $\beta$ -chain (middle row). Numbers of analyzed cells are indicated. Shades of gray represent private clonotypes or TCR chains, colors indicate sharing among individuals. (c) Frequencies of TRAV, TRAJ, TRBV and TRBJ genes detected in unique Flu MP<sub>58-66</sub> specific clonotypes (n=90) identified in donors shown in A. TRAV, TRAJ, TRBV and TRBJ gene analysis reveals preferential usage of *TRBV19* and *TRBJ2-7* in TCR  $\beta$ -chains and *TRAJ42* in TCR  $\alpha$ -chains of Flu MP<sub>58-66</sub> specific CD8<sup>+</sup> T cells.

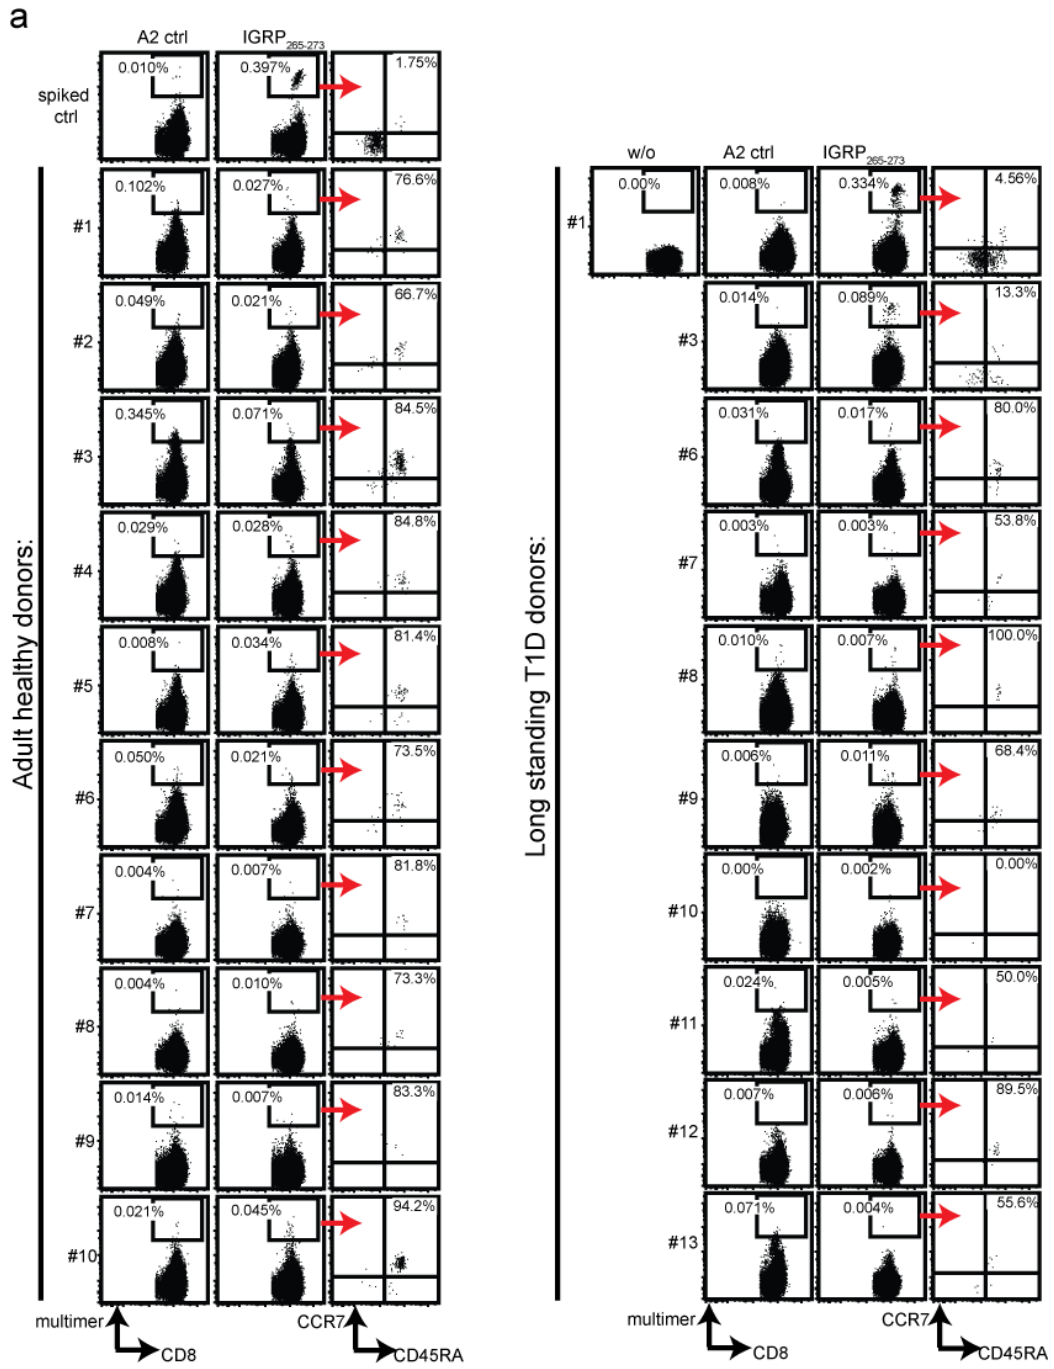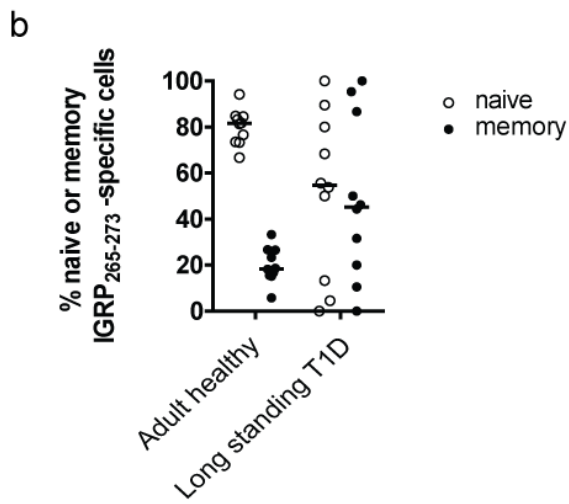

**Supplementary Fig. S2: Phenotypic characterization of IGRP<sub>265-273</sub>-specific CD8<sup>+</sup> T cells in healthy adults and patients with long standing type 1 diabetes.** (a) Analysis of CCR7 and CD45RA expression on IGRP<sub>265-273</sub>-specific CD8<sup>+</sup> T cells in healthy donors (n=10) and patients with long standing type 1 diabetes (n=10). PBMC were stained without (w/o) or with either control peptide (HLA-A2<sub>140-149</sub>) or IGRP<sub>265-273</sub> loaded multimers. Staining of PBMC samples spiked with IGRP<sub>265-273</sub> specific CD8<sup>+</sup> T cell clones served as controls (upper row). Plots of multimer stainings show cells in the CD8 gate and at least 5 x 10<sup>4</sup> events are shown. Plots of CCR7/CD45RA expression show all events of the ancestor gate and frequencies of naïve (CD45RA<sup>+</sup>CCR7<sup>+</sup>) cells are indicated. For patients with long standing type 1 diabetes representative FACS plots of donors with high (T1D-1 and T1D-3) and low frequencies (T1D-6-13) of IGRP<sub>265-273</sub> specific CD8<sup>+</sup> T cells are shown. (b) Data graph summarizing the frequencies of naïve (CCR7<sup>+</sup>CD45RA<sup>+</sup>; open symbols) and memory (CCR7<sup>+</sup>CD45RA<sup>-</sup>, CCR7<sup>-</sup>CD45RA<sup>+/+</sup>; filled symbols) IGRP<sub>265-273</sub>-specific CD8<sup>+</sup> T cells of adult healthy donors and patients with long standing type 1 diabetes shown in (a).

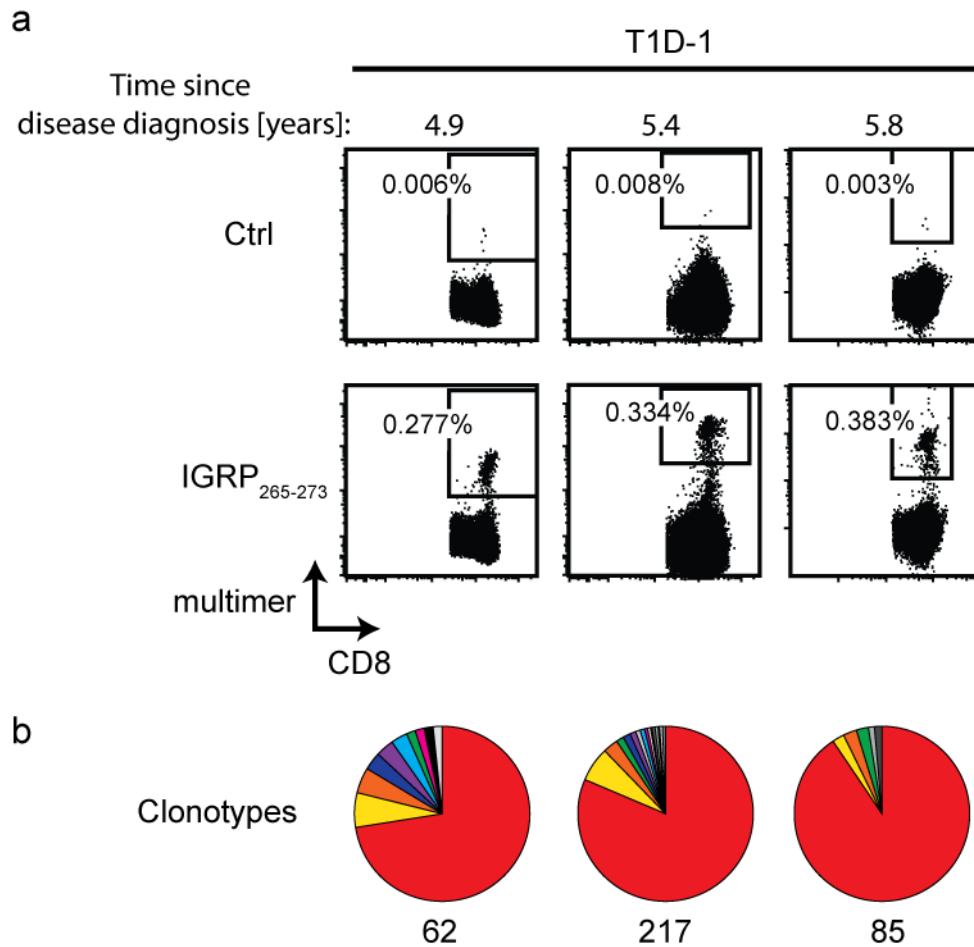

**Supplementary Fig. S3: Persistence of IGRP<sub>265-273</sub> specific CD8<sup>+</sup> T cells and clonotypes in T1D-1.** (a) Representative FACS plots of multimer stainings performed on PBMC samples taken at three independent timepoints. PBMC samples were stained with HLA-A2 multimers loaded with control peptide (HLA-A2<sub>140-149</sub>; top row) or IGRP<sub>265-273</sub> (bottom row). Plots show 10<sup>5</sup> cells in the CD8 gate. (b) TCR repertoire analysis upon TCR  $\alpha$ - and  $\beta$ -chain sequencing of IGRP<sub>265-273</sub> specific CD8<sup>+</sup> T cells isolated as single cells from samples of three individual timepoints. Pieces of pies represent distinct clonotypes and same colors represent same clonotypes. Numbers of cells for which parallel TCR  $\alpha$ - and  $\beta$ -chain information was obtained for each individual timepoint are indicated.

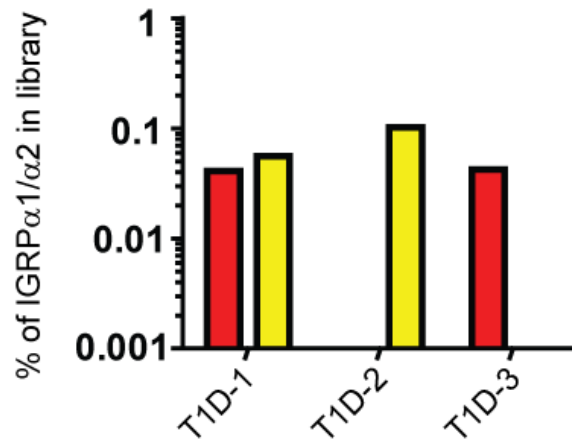

**Supplementary Figure S4: Retrieval of IGRP α1 and IGRP α2 via TCR α-chain next generation sequencing.** cDNA libraries of bulk sorted CD3<sup>+</sup>CD8<sup>+</sup> T cells from donors T1D-1, T1D-2, T1D-3 were screened for message of the dominant IGRP<sub>265-273</sub>-specific TCR α-chains IGRP α1 and IGRP α2 shown in Figure 1C (and depicted in red and yellow). Bars in the data graph represent frequencies (y axis) of the respective messages among all TCR α-chain messages in a given library.

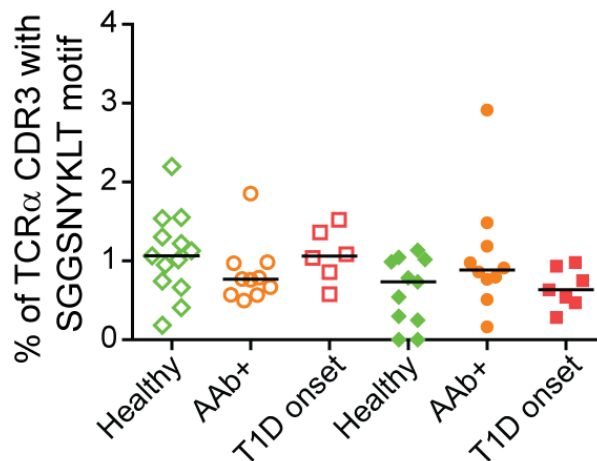

**Supplementary Fig. S5: Next generation sequencing read frequencies of TCR α-chain CDR3 harboring the SGGSNYKLT motif in CD8<sup>+</sup> T cell libraries.** Naïve (CCR7<sup>+</sup>CD45RA<sup>+</sup>; open symbols) and memory (CCR7<sup>+</sup>CD45RA<sup>-</sup>, CCR7<sup>-</sup>CD45RA<sup>+</sup>; filled symbols) CD8<sup>+</sup> T cells of healthy donors (n=14, green symbols) or donors with multiple islet autoantibodies (AAb+; n=13; orange symbols) or recent onset type 1 diabetes (n=8; red symbols) were flow sorted from PBMC, their RNA extracted, individual cDNA libraries prepared and processed via next generation sequencing. TCR α-chain sequences were extracted and screened for those harboring the SGGSNYKLT motif. Frequencies of motif containing sequences in individual libraries are shown. Lines indicate median values.

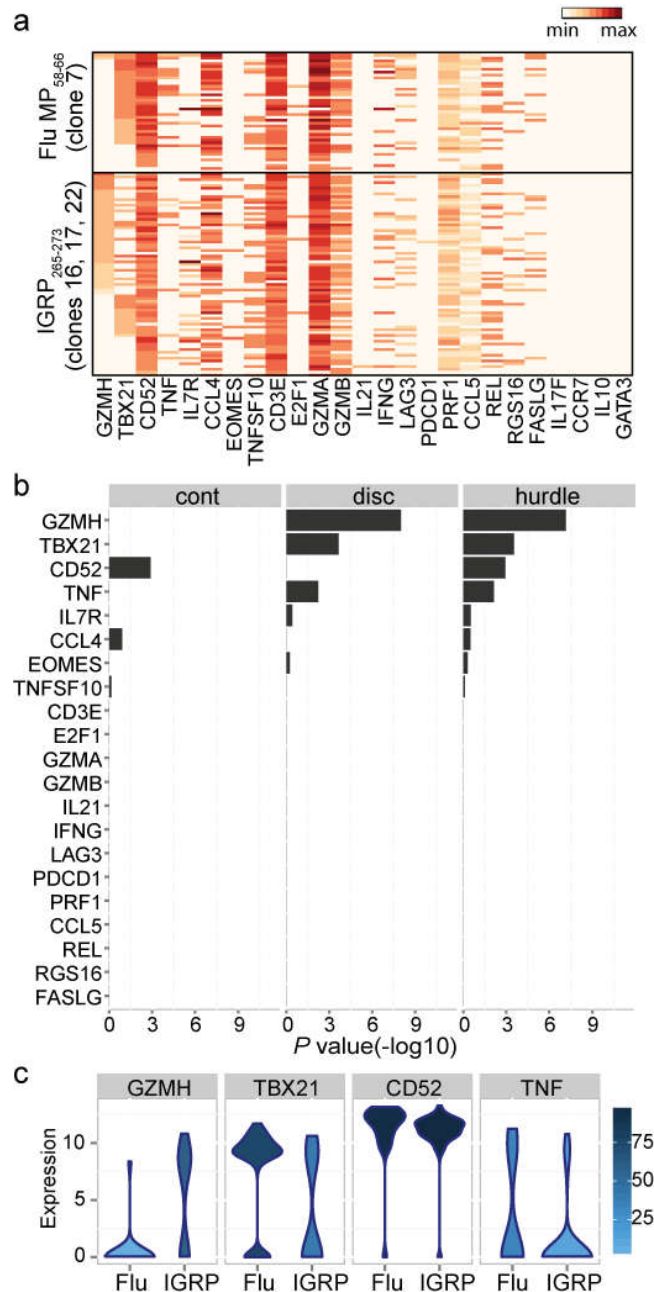

**Supplementary Fig. S6: Gene transcription profiles of Flu MP<sub>58-66</sub> and IGRP<sub>265-273</sub> specific CD8<sup>+</sup> T cell clones.** Clones were single cell-sorted and processed for multi-parameter gene expression analysis as described in supplementary methods below. The profiles for 42 Flu MP<sub>58-66</sub>-specific cells of clone 7 and 72 IGRP<sub>265-273</sub>-specific cells of clones 16, 17, and 22 are shown. **(a)** Heatmaps showing expression profiles. Genes are ordered left to right according to their overall significance for comparisons between cells from the two groups using the Hurdle model. Each row represents an individual cell. Cells are ordered according to their expression of the genes *GZMH*, *TBX21*, *CD52* and *TNF* **(b)** Bar chart showing p-values for gene expression comparisons between FluMP<sub>58-66</sub>- and IGRP<sub>265-273</sub>-specific CD8<sup>+</sup> T cell clones using a continuous (left panel), discontinuous (middle) and the Hurdle (right) model. **(c)** Violin plots showing the distribution of Ct expression values for genes differentially expressed ( $P < 0.01$ ) in Flu MP<sub>58-66</sub>- and IGRP<sub>265-273</sub>-specific cells in (A). The proportion of cells expressing the gene ranges from light blue (0%) to dark blue (100%).



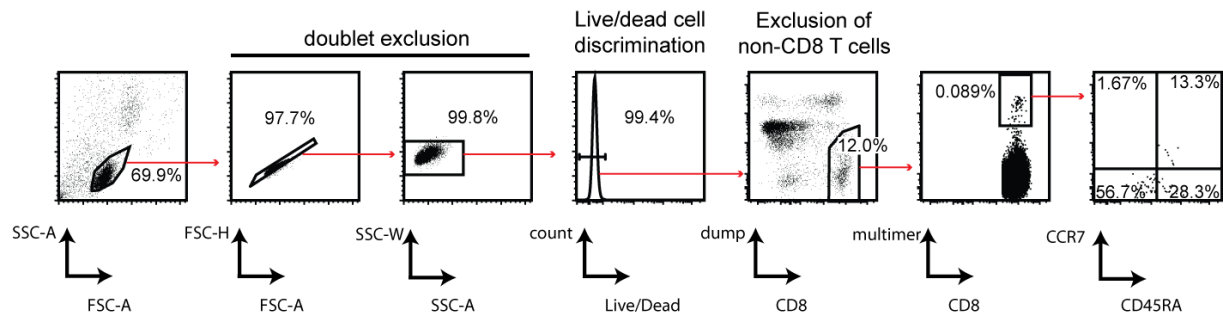

**Supplementary Fig. S7: Gating strategy for the analysis and single cell sorting of antigen-specific CD8<sup>+</sup> T cells.** Representative FACS plots for the gating of multimer positive CD8<sup>+</sup> T cells and the analysis of CCR7 and CD45RA expression are shown. Forward and side scatter channels were used to gate on lymphocytes and to exclude doublet cells. Live/Dead cell marker staining was used to gate on viable cells. Dump marker (CD4, CD14, CD16, CD19, CD56, CD335) were used to simplify gating on CD8<sup>high</sup> T cells and subsequently multimer positive cells.

**Supplementary Table S1: CD8<sup>+</sup> T cell clonotypes and TCR chains identified in multimer isolated antigen-specific single cells.** TCR sequencing information of the CDR3 region retrieved from 775 antigen-specific CD8<sup>+</sup> T cells is listed. Rows are ordered according to the peptide antigen the cells were directed against, the individuals they were obtained from, the number of cells detected with a specific TCR information (enriched: information retrieved from more than one cell; single: information retrieved from one cell) and the completeness of TCR information, i.e paired TCR $\alpha$ / TCR $\beta$  information followed by TCR $\alpha$  information only, TCR $\beta$  information only. TCR names are given to unique TCR $\alpha$ / TCR $\beta$  pairs (clonotypes). TCR $\alpha$  and TCR $\beta$  CDR3 names are given to unique TCR $\alpha$  and TCR $\beta$  CDR3 sequences, respectively. Identical TCR CDR3 sequences present in several rows are marked (colored cells), TCR TRAV, TRAJ, TRBV and TRBJ genes used in more than 20 percent of clonotypes directed against the Flu MP<sub>58-66</sub> or IGRP<sub>265-273</sub> antigen are marked with colored font. Inter-individual sharing of sequences or previous description of sequences by others<sup>1-5</sup> are remarked under comments. N/A=sequence information not available; T1D=type 1 diabetes patient; HC=healthy control donor; RO=recent onset

*Please note: For facilitated extraction and further use of the sequence data an Excel-file of Supplementary Table S1 can be provided by the authors on request.*



| Antigen    | Donor  | TCR name (clonotype) | TRBV     | TRBJ   | TRBD            | TCRβ CDR3 sequence | TCRβ CDR3 name | TRAV        | TRAJ  | TCRα CDR3 sequence | TCRα CDR3 name | Number cells | Comments                                                                                                                                                                   |  |
|------------|--------|----------------------|----------|--------|-----------------|--------------------|----------------|-------------|-------|--------------------|----------------|--------------|----------------------------------------------------------------------------------------------------------------------------------------------------------------------------|--|
| FluMP58-66 | T1D-1  | FLUMP58_T1D-1_1      | 19*01    | 2-3*01 | 2*01            | CASSGGGSKKTQF      | FLU β53        | 29/DV5*01   | 42*01 | CAASAGGGSQGNLIF    | FLU α56        | 3            | Enriched                                                                                                                                                                   |  |
|            |        | FLUMP58_T1D-1_2      | 19*01    | 2-7*01 | 1*01            | CASRRGRSSYEHYF     | FLU β54        | 26-1*01     | 53*01 | CIVSVLQWGSQGNLIF   | FLU α57        | 2            |                                                                                                                                                                            |  |
|            |        | FLUMP58_T1D-1_3      | 19*01    | 2-1*01 | 2*01            | CASSIRSLDEQFF      | FLU β55        | 25*01       | 42*01 | CAGSGGGSQGNLIF     | FLU α58        | 2            |                                                                                                                                                                            |  |
|            |        | Single               |          |        |                 |                    |                |             |       |                    |                |              |                                                                                                                                                                            |  |
|            |        | FLUMP58_T1D-1_4      | 19*01    | 2-1*01 | 2*01            | CASSIRSLDEQFF      | FLU β55        | 25*01       | 42*01 | CPVTLSLAYSPIINF    | FLU α59        | 1            | TCRα CDR3 previously described by: Naumov et al., 2008; TCRα CDR3 shared with HC2                                                                                          |  |
|            |        | FLUMP58_T1D-1_5      | 19*01    | 2-1*01 | 1*01            | CASSFTKDYSTMF      | FLU β56        | 29/DV5*01   | 42*01 | CTSVQAL#GGSGQNLIF  | FLU α60        | 1            |                                                                                                                                                                            |  |
|            |        | FLUMP58_T1D-1_6      | 19*01    | 2-3*01 | 2*01            | CAGGRKRNTQYF       | FLU β57        | 29/DV5*01   | 42*01 | CTSVQAL#GGSGQNLIF  | FLU α60        | 1            |                                                                                                                                                                            |  |
|            |        | FLUMP58_T1D-1_7      | 19*01    | 1-2*01 | 1*01            | CASRTATHGYTF       | FLU β58        | 3*01        | 36*01 | CAVRDGTGANNLFF     | FLU α37        | 1            |                                                                                                                                                                            |  |
|            |        | FLUMP58_T1D-1_8      | 19*01    | 2-1*01 | 2*01            | CASSELGGXANGQFF    | FLU β59        | 3*01        | 37*02 | CAVNRHSSNTGKLI     | FLU α61        | 1            |                                                                                                                                                                            |  |
|            |        | FLUMP58_T1D-1_9      | 19*01    | 2-7*01 | 1*01            | CASSDRSSYEQYF      | FLU β60        | 26-1*01     | 53*01 | CIVRQLGTGAVVTIN*#F | FLU α62        | 1            |                                                                                                                                                                            |  |
|            |        | FLUMP58_T1D-1_10     | 19*01    | 2-7*01 | 1*01            | CASSTRPSYEQYF      | FLU β61        | 8-6*02      | 37*02 | CAVSSNTGKLI        | FLU α63        | 1            |                                                                                                                                                                            |  |
|            |        | FLUMP58_T1D-1_11     | 19*01    | 2-3*01 | 1*01            | CASSGRPTETQYF      | FLU β62        | 25*01       | 42*01 | CAVSYGGGQGNLIF     | FLU α16        | 1            | TCRα CDR3 shared with HC1;                                                                                                                                                 |  |
|            |        | FLUMP58_T1D-1_12     | 19*01    | 2-1*01 | 2*01            | CAGSVLRGGRNERFF    | FLU β63        | 36/DV7*02   | 22*01 | CAVED#ISSGARQLTF   | FLU α64        | 1            |                                                                                                                                                                            |  |
|            |        | FLUMP58_T1D-1_13     | 27*01    | 2-2*01 | 1*01            | CASLIFPGELFF       | FLU β64        | 8-4*03      | 45*01 | VL#GGGADGLTF       | FLU α65        | 1            |                                                                                                                                                                            |  |
|            |        | FLUMP58_T1D-1_14     | 27*01    | 1-5*01 | 1*01            | CASSLMGQGINQPHF    | FLU β65        | 17*01       | 23*01 | CARSRNKQGGIFFF     | FLU α66        | 1            |                                                                                                                                                                            |  |
|            |        | FLUMP58_T1D-1_15     | 3-2*01   | 2-3*01 | 2*01            | CASRGA*RRGVRR#F    | FLU β66        | 8-2*01      | 52*01 | VL*V#AGGTSYGKLI    | FLU α67        | 1            |                                                                                                                                                                            |  |
|            |        | FLUMP58_T1D-1_16     | 4-3*01   | 1-4*01 | 1*01            | CASSOEWGINEKLF     | FLU β67        | 25*01       | 23*01 | CAGSPIYNQGGKLI     | FLU α68        | 1            |                                                                                                                                                                            |  |
|            |        | FLUMP58_T1D-1_17     | 7-8*01   | 2-7*01 | 2*01            | CATPTNLGGGGNYF     | FLU β68        | 29/DV5*01   | 52*01 | VQDQLGY#GGTSYGKLI  | FLU α69        | 1            |                                                                                                                                                                            |  |
|            |        | FLUMP58_T1D-1_18     | 19*01    | 2-3*01 | 2*01            | CASSGGSKNYAVF      | FLU β69        | 29/DV5*01   | 42*01 | CAASAGGGSQGNLIF    | FLU α56        | 1            |                                                                                                                                                                            |  |
|            |        | FLUMP58_T1D-1_19     | 19*01    | 1-5*01 | 1*01            | CASSIHGANQPQHF     | FLU β70        | 23/DV6*01   | 33*01 | CAASARSMDSNYQLIW   | FLU α70        | 1            |                                                                                                                                                                            |  |
|            |        | FLUMP58_T1D-1_20     | 19*01    | 1-5*01 | 1*01            | CASSIRGANQPQHF     | FLU β71        | 23/DV6*01   | 33*01 | CAASARSMDSNYQLIW   | FLU α70        | 1            |                                                                                                                                                                            |  |
|            |        | FLUMP58_T1D-1_21     | 19*01    | 1-1*01 | 1*01            | CAGSVTGALGTEAFF    | FLU β72        | 17*01       | 52*01 | CATDDHAGGTSYGKLI   | FLU α71        | 1            |                                                                                                                                                                            |  |
|            |        | FLUMP58_T1D-1_22     | 19*01    | 2-3*01 | 1*01            | CASRKRGTAEQFF      | FLU β73        | 3*01        | 42*01 | CASPGGGGQGNLIF     | FLU α72        | 1            |                                                                                                                                                                            |  |
|            |        | FLUMP58_T1D-1_23     | 19*01    | 2-7*01 | 1*01            | CASRTRSAYEQYF      | FLU β74        | 27*01       | 42*01 | CAGGGGQGNLIF       | FLU α31        | 1            | TCRα CDR3 previously described by: Gil et al., 2015; Valkenburg et al., 2016; TCRα CDR3 shared with HC2                                                                    |  |
|            |        | FLUMP58_T1D-1_24     | 19*01    | 1-5*01 | 1*01            | CASSIHGANQPQHF     | FLU β70        | 23/DV6*01   | 33*01 | CAAGGGAWLARISF     | FLU α73        | 1            |                                                                                                                                                                            |  |
|            |        | FLUMP58_T1D-1_25     | 19*01    | 2-7*01 | 1*01            | CASSIRSSYEQYF      | FLU β75        | 29/DV5*01   | 42*01 | CAASATPYGGGQGNLIF  | FLU α74        | 1            |                                                                                                                                                                            |  |
|            |        | FLUMP58_T1D-1_26     | 4-2*01   | 1-2*01 | 1*01            | CASSPGTPTYGYTF     | FLU β76        | 8-2*01      | 30*01 | CAVSDLIIGDDKLI     | FLU α75        | 1            |                                                                                                                                                                            |  |
|            |        | FLUMP58_T1D-1_27     | 19*01    | 2-3*01 | 1*01            | CASSPRSTDQYF       | FLU β77        | 25*01 F     | 42*01 | CAGASGGGQGNLIF     | FLU α76        | 1            | TCRα CDR3 previously described by: Gil et al., 2015; Naumov et al., 2008; TCRβ CDR3 previously described by: Lehner et al., 1995; Naumov et al., 1998; Naumov et al., 2008 |  |
|            |        | FLUMP58_T1D-1_28     | 18*01 F  | 2-2*01 | 1*01            | CASSQTGAELFF       | FLU β78        | 36/DV7*02   | 32*02 | CAVGGATNKLI        | FLU α77        | 1            |                                                                                                                                                                            |  |
|            |        | FLUMP58_T1D-1_29     | 6-5*01 F | 2-5*01 | 1*01            | CASSTLTGAETQYF     | FLU β79        | 24*01       | 47*01 | CAFIHLEYGNKLVF     | FLU α78        | 1            |                                                                                                                                                                            |  |
|            |        | FLUMP58_T1D-1_30     | 27*01    | 1-1*01 | 1*01            | CASSTRGVSKVFF      | FLU β80        | 14/DV4*02 F | 33*01 | CAMREVIHMSNYQLIR   | FLU α79        | 1            |                                                                                                                                                                            |  |
|            |        | FLUMP58_T1D-1_31     | 19*01    | 2-7*01 | 1*01            | CASSIRSSYEQYF      | FLU β81        | 26-2*01     | 42*01 | CTPG#SQGNLIF       | FLU α80        | 1            | TCRβ CDR3 previously described by: Lehner et al., 1995, Valkenburg et al., 2016                                                                                            |  |
|            |        | FLUMP58_T1D-1_32     | 19*01    | 2-7*01 | 1*01            | CASSIRSSYEQYF      | FLU β81        | 36/DV7*02   | 45*01 | CI##GGADGLTF       | FLU α81        | 1            | TCRβ CDR3 previously described by: Lehner et al., 1995, Valkenburg et al., 2016                                                                                            |  |
|            |        | NA                   | NA       | NA     | NA              | NA                 | NA             | 23/DV6*01   | 33*01 | CAEKARSMVXNYQLIW   | FLU α82        | 1            |                                                                                                                                                                            |  |
|            |        | NA                   | NA       | NA     | NA              | NA                 | NA             | 27*01       | 27*01 | CAGANTNAGKSTF      | FLU α83        | 1            |                                                                                                                                                                            |  |
|            |        | NA                   | NA       | NA     | NA              | NA                 | NA             | 22*01       | 37*02 | CAVGPSNTGKLI       | FLU α84        | 1            |                                                                                                                                                                            |  |
|            |        | NA                   | NA       | NA     | NA              | NA                 | NA             | 8-6*01      | 42*01 | CAVSGGNYGVXQGNLIF  | FLU α85        | 1            |                                                                                                                                                                            |  |
|            |        | NA                   | NA       | NA     | NA              | NA                 | NA             | 8-4*03      | 15*01 | CCEGLM#AGTALIF     | FLU α86        | 1            |                                                                                                                                                                            |  |
|            |        | NA                   | NA       | NA     | NA              | NA                 | NA             | 36/DV7*02   | 45*01 | CI##GGADGLTF       | FLU α87        | 1            |                                                                                                                                                                            |  |
|            |        | NA                   | NA       | NA     | NA              | NA                 | NA             | 26-2*01     | 10*01 | CILRDPFTGGIKFTF    | FLU α88        | 1            |                                                                                                                                                                            |  |
|            |        | NA                   | NA       | NA     | NA              | NA                 | NA             | 26-1*01     | 2*01  | CIVRVLGIVEVATIN*#F | FLU α89        | 1            |                                                                                                                                                                            |  |
|            |        | NA                   | NA       | NA     | NA              | NA                 | NA             | 3*01        | 8*01  | CAVRDLNTGFQKLVF    | FLU α90        | 1            |                                                                                                                                                                            |  |
|            |        | NA                   | NA       | NA     | NA              | NA                 | NA             | 26-1*01     | 52*01 | CIVRRGGTSYGKLI     | FLU α91        | 1            |                                                                                                                                                                            |  |
|            |        | NA                   | NA       | NA     | NA              | NA                 | NA             | 29/DV5*01   | 15*01 | VQYYS#QAGTALIF     | FLU α92        | 1            |                                                                                                                                                                            |  |
|            |        | NA                   | NA       | NA     | NA              | NA                 | NA             | 25*01       | 9*01  | CAEEDDTGGFKTI      | FLU α93        | 1            |                                                                                                                                                                            |  |
|            |        | NA                   | NA       | NA     | NA              | NA                 | NA             | 29/DV5*01   | 42*01 | CTSVQAL#GGSGQNLIF  | FLU α60        | 1            |                                                                                                                                                                            |  |
|            |        | NA                   | NA       | NA     | NA              | NA                 | NA             | 29/DV5*01   | 42*01 | CTSVQAL#GGSGQNLIF  | FLU α60        | 1            |                                                                                                                                                                            |  |
|            |        | NA                   | NA       | NA     | NA              | NA                 | NA             | 23/DV6*01   | 33*01 | CAASARSMDSNYQLIW   | FLU α70        | 1            |                                                                                                                                                                            |  |
|            |        | NA                   | NA       | NA     | NA              | NA                 | NA             | 3*01        | 36*01 | CAVRDGTGANNLFF     | FLU α37        | 1            | TCRα CDR3 previously described by: Naumov et al., 2008; TCRα CDR3 shared with HC2                                                                                          |  |
|            |        | 19*01                | 1-2*01   | 2*02   |                 |                    | CAGGIGSYGYPF   | FLU β82     | NA    | NA                 | NA             | NA           | 1                                                                                                                                                                          |  |
|            |        | 19*01                | 1-2*01   | 1*01   |                 |                    | CASGIGGGYYP    | FLU β83     | NA    | NA                 | NA             | NA           | 1                                                                                                                                                                          |  |
|            |        | 19*01                | 2-7*01   | 2*01   |                 |                    | CASGIRSSYERYF  | FLU β84     | NA    | NA                 | NA             | NA           | 1                                                                                                                                                                          |  |
|            |        | 19*01                | 2-5*01   | 2*02   |                 |                    | CASGSIEETQYF   | FLU β85     | NA    | NA                 | NA             | NA           | 1                                                                                                                                                                          |  |
|            |        | 19*01                | 2-7*01   | 1*01   |                 |                    | CASGXRRXYEXF   | FLU β86     | NA    | NA                 | NA             | NA           | 1                                                                                                                                                                          |  |
|            |        | 19*01                | 2-7*01   | 1*01   |                 |                    | CASRARSPNEQNF  | FLU β87     | NA    | NA                 | NA             | NA           | 1                                                                                                                                                                          |  |
| 19*01      | 1-1*01 | 1*01                 |          |        | CASRATGGLGPEAFF | FLU β88            | NA             | NA          | NA    | NA                 | 1              |              |                                                                                                                                                                            |  |
| 19*01      | 1-2*01 | 2*02                 |          |        | CASRIGINGYYP    | FLU β89            | NA             | NA          | NA    | NA                 | 1              |              |                                                                                                                                                                            |  |
| 19*01      | 2-7*01 | 1*01                 |          |        | CASRIRGGSEXXF   | FLU β90            | NA             | NA          | NA    | NA                 | 1              |              |                                                                                                                                                                            |  |
| 19*01      | 2-7*01 | 1*01                 |          |        | CASRIRGSYEQYF   | FLU β91            | NA             | NA          | NA    | NA                 | 1              |              |                                                                                                                                                                            |  |
| 19*01      | 2-5*01 | 2*02                 |          |        | CASRRKSSEAYF    | FLU β92            | NA             | NA          | NA    | NA                 | 1              |              |                                                                                                                                                                            |  |
| 19*01      | 2-1*01 | 1*01                 |          |        | CASRSTGDYSTMS#F | FLU β93            | NA             | NA          | NA    | NA                 | 1              |              |                                                                                                                                                                            |  |
| 19*01      | 1-1*01 | 1*01                 |          |        | CASSGTXLNTEAFF  | FLU β94            | NA             | NA          | NA    | NA                 | 1              |              |                                                                                                                                                                            |  |
| 19*01      | 1-2*01 | 1*01                 |          |        | CASSIGGGYYP     | FLU β95            | NA             | NA          | NA    | NA                 | 1              |              |                                                                                                                                                                            |  |

| Antigen    | Donor  | TCR name (clonotype) | TRBV    | TRBJ           | TRBD     | TCRβ CDR3 sequence     | TCRβ CDR3 name | TRAV | TRAJ | TCRα CDR3 sequence | TCRα CDR3 name                                                                  | Number cells | Comments                                                  |
|------------|--------|----------------------|---------|----------------|----------|------------------------|----------------|------|------|--------------------|---------------------------------------------------------------------------------|--------------|-----------------------------------------------------------|
| FluMP58-66 | T1D-1  |                      | 19*01   | 2*7*01         | 1*01     | CASSIRGSYEQYF          | FLU β96        | NA   | NA   | NA                 |                                                                                 | 1            |                                                           |
|            |        |                      | 19*01   | 2*7*01         | 2*01     | CASSIRPSYERYF          | FLU β97        | NA   | NA   | NA                 |                                                                                 | 1            |                                                           |
|            |        |                      | 19*01   | 2*7*01         | 2*01     | CASSIRSSYERYF          | FLU β98        | NA   | NA   | NA                 |                                                                                 | 1            |                                                           |
|            |        |                      | 27*01   | 1*6*02         | 1*01     | CASSLSLGDRLXPYNSPXXF   | FLU β99        | NA   | NA   | NA                 |                                                                                 | 1            |                                                           |
|            |        |                      | 28*01   | 2*7*01         | 1*01     | CASSSWTGXXIXX#         | FLU β100       | NA   | NA   | NA                 |                                                                                 | 1            |                                                           |
|            |        |                      | 19*01   | 1*2*01         | 1*01     | CASSTGLGYTF            | FLU β101       | NA   | NA   | NA                 |                                                                                 | 1            |                                                           |
|            |        |                      | 19*01   | 1*2*01         | 1*01     | CASSTGLGYPF            | FLU β102       | NA   | NA   | NA                 |                                                                                 | 1            |                                                           |
|            |        |                      | 7*8*03  | 2*7*01         | 1*01     | CASSTSLGGGARQYF        | FLU β103       | NA   | NA   | NA                 |                                                                                 | 1            |                                                           |
|            |        |                      | 24*1*01 | 2*7*01         | 1*01     | CATRKFGRKD#EQYF        | FLU β104       | NA   | NA   | NA                 |                                                                                 | 1            |                                                           |
|            |        |                      | 29*1*01 | 2*6*01         | 1*01     | CSVDROG#SGANVLT        | FLU β105       | NA   | NA   | NA                 |                                                                                 | 1            |                                                           |
|            |        |                      | 19*01   | 2*7*01         | 2*01     | CVCRXGGSYERDF          | FLU β106       | NA   | NA   | NA                 |                                                                                 | 1            |                                                           |
|            |        |                      | 19*01   | 1*2*01         | NA       | CVGRKGRDGYPF           | FLU β107       | NA   | NA   | NA                 |                                                                                 | 1            |                                                           |
|            |        |                      | 23*1*01 | 2*7*01         | NA       | CXRPXXGGGXTLPPTGP      | FLU β108       | NA   | NA   | NA                 |                                                                                 | 1            |                                                           |
|            |        |                      | 19*01   | 2*5*01         | NA       | CXSSVRSSYEQYF          | FLU β109       | NA   | NA   | NA                 |                                                                                 | 1            |                                                           |
|            |        |                      | 19*02   | 2*7*01         | 1*01     | CXSIIRPXXQXF           | FLU β110       | NA   | NA   | NA                 |                                                                                 | 1            |                                                           |
|            |        |                      | 19*03   | 1*2*01         | NA       | CAGXKGSXPTL            | FLU β111       | NA   | NA   | NA                 |                                                                                 | 1            |                                                           |
|            |        |                      | 19*04   | 1*5*01         | 2*02     | CASGNGDPLXF            | FLU β112       | NA   | NA   | NA                 |                                                                                 | 1            |                                                           |
|            |        |                      | 19*05   | 2*7*01         | 2*01     | CASSRSPYEQYF           | FLU β113       | NA   | NA   | NA                 |                                                                                 | 1            |                                                           |
|            |        |                      | 19*06   | 2*1*01         | 1*01     | CAGRVGSAPAXSC          | FLU β114       | NA   | NA   | NA                 |                                                                                 | 1            |                                                           |
|            |        |                      | 27*01   | 2*7*01         | 2*01     | CAGXFGGSSKQXF          | FLU β115       | NA   | NA   | NA                 |                                                                                 | 1            |                                                           |
|            |        |                      | 23*1*01 | 2*7*01         | NA       | CASAKXSGRNSLPXXGX      | FLU β116       | NA   | NA   | NA                 |                                                                                 | 1            |                                                           |
|            |        |                      | 5*1*01  | 2*1*01         | 1*01     | CASCLGGGSYNEQFF        | FLU β117       | NA   | NA   | NA                 |                                                                                 | 1            |                                                           |
|            |        |                      | 19*01   | 1*2*01         | 1*01     | CASGIGGYGYPF           | FLU β118       | NA   | NA   | NA                 |                                                                                 | 1            |                                                           |
|            |        |                      | 27*01   | 2*5*01         | 1*01     | CASSFGGAETQYF          | FLU β119       | NA   | NA   | NA                 |                                                                                 | 1            |                                                           |
|            |        |                      | 19*01   | 2*7*01         | 1*01     | CASSGRSPYEQDF          | FLU β120       | NA   | NA   | NA                 |                                                                                 | 1            |                                                           |
|            |        |                      | 19*01   | 1*2*01         | NA       | CASSIGYGYTF            | FLU β121       | NA   | NA   | NA                 |                                                                                 | 1            |                                                           |
|            |        |                      | 19*01   | 1*5*01         | 2*02     | CASSISLNPQHF           | FLU β122       | NA   | NA   | NA                 |                                                                                 | 1            |                                                           |
|            |        |                      | 19*01   | 1*5*01         | 2*01     | CASSKRSNPPQHF          | FLU β123       | NA   | NA   | NA                 |                                                                                 | 1            |                                                           |
|            |        |                      | 28*01   | 2*1*01         | 2*01     | CASSLPDLASGRKTRSYNEQFF | FLU β124       | NA   | NA   | NA                 |                                                                                 | 1            |                                                           |
|            |        |                      | 28*01   | 2*7*01         | 1*01     | CASSSWTG#SYEQYF        | FLU β125       | NA   | NA   | NA                 |                                                                                 | 1            |                                                           |
|            |        |                      | 28*01   | 2*7*01         | 1*01     | CASSSWTGGPTSS#         | FLU β126       | NA   | NA   | NA                 |                                                                                 | 1            |                                                           |
|            |        |                      | 19*01   | 2*5*01         | 1*01     | CASSTRSGETQYF          | FLU β127       | NA   | NA   | NA                 |                                                                                 | 1            |                                                           |
|            |        |                      | 19*01   | 2*7*01         | NA       | CASSVRSSYEQYF          | FLU β128       | NA   | NA   | NA                 |                                                                                 | 1            | TCRβ CDR3 previously described by: Valkenburg et al. 2016 |
|            |        |                      | 19*01   | 1*2*01         | 1*01     | GASSIGFYTF             | FLU β129       | NA   | NA   | NA                 |                                                                                 | 1            |                                                           |
|            |        |                      | 19*01   | 2*7*01         | 1*01     | CASSIRGSYEQYF          | FLU β96        | NA   | NA   | NA                 |                                                                                 | 1            |                                                           |
|            | 19*01  | 2*7*01               | 1*01    | CASSIRPSYEQYF  | FLU β27  | NA                     | NA             | NA   |      | 1                  | TCRβ CDR3 shared with HC2                                                       |              |                                                           |
|            | 19*01  | 1*2*01               | 1*01    | CASSTGLGYPF    | FLU β130 | NA                     | NA             | NA   |      | 1                  |                                                                                 |              |                                                           |
|            | 19*01  | 1*2*01               | 2*02    | CASRIGYGYTF    | FLU β131 | NA                     | NA             | NA   |      | 1                  |                                                                                 |              |                                                           |
|            | 19*01  | 2*7*01               | 1*01    | CASSIRSSYEQYF  | FLU β81  | NA                     | NA             | NA   |      | 1                  | TCRβ CDR3 previously described by: Lehner et al., 1995, Valkenburg et al., 2016 |              |                                                           |
|            | 19*01  | 1*2*01               | 2*02    | CASSTGSYGYTF   | FLU β132 | NA                     | NA             | NA   |      | 1                  | TCRβ CDR3 previously described by: Lehner et al., 1995; Naumov et al., 1998     |              |                                                           |
|            | 19*01  | 2*7*01               | 2*02    | CASSIGSYGYTF   | FLU β133 | NA                     | NA             | NA   |      | 1                  | TCRβ CDR3 previously described by: Naumov et al., 1998, Valkenburg et al. 2016  |              |                                                           |
|            | 19*01  | 2*1*01               | 2*01    | CASSRSAIEQFF   | FLU β134 | NA                     | NA             | NA   |      | 1                  |                                                                                 |              |                                                           |
|            | 19*02  | 2*7*02               | 2*02    | CASSIRSAIEQYF  | FLU β75  | NA                     | NA             | NA   |      | 1                  |                                                                                 |              |                                                           |
|            | 19*01  | 2*1*01               | 2*01    | CASSIRSLDEQFF  | FLU β55  | NA                     | NA             | NA   |      | 1                  |                                                                                 |              |                                                           |
|            | 7*2*01 | 2*7*01               | 2*01    | CASSTSLGGGRQSF | FLU β135 | NA                     | NA             | NA   |      | 1                  |                                                                                 |              |                                                           |

| Antigen              | Donor   | TCR name (clonotype) | TRBV    | TRBJ                | TRBD     | TCRβ CDR3 sequence  | TCRβ CDR3 name | TRAV            | TRAJ     | TCRα CDR3 sequence | TCRα CDR3 name              | Number cells | Comments                    |        |
|----------------------|---------|----------------------|---------|---------------------|----------|---------------------|----------------|-----------------|----------|--------------------|-----------------------------|--------------|-----------------------------|--------|
| IGRP265-273          | T1D-1   |                      |         |                     |          |                     |                |                 |          |                    |                             |              | Enriched                    |        |
|                      |         | IGRP265-273_T1D-1_1  | 3*1*01  | 2*4*01              | 1*01     | CASSQDRWDVMSKNIQYF  | IGRP β1        | 25*01           | 53*01    | CAGLDGSGGSNYKLT    | IGRP α1                     | 299          | TCRα CDR3 shared with T1D-3 |        |
|                      |         | IGRP265-273_T1D-1_2  | 10*3*01 | 1*2*01              | 1*01     | CAISEMILIRGLANYGYPF | IGRP β2        | 29/DV5*01       | 53*01    | CAASGGSNYKLT       | IGRP α2                     | 20           | TCRα CDR3 shared with T1D-2 |        |
|                      |         | IGRP265-273_T1D-1_3  | 10*3*01 | 1*2*01              | 2*02     | CAISDRFMREMTYGYPF   | IGRP β3        | 29/DV5*01       | 53*01    | CAASGGSNYKLT       | IGRP α2                     | 11           | TCRα CDR3 shared with T1D-2 |        |
|                      |         | IGRP265-273_T1D-1_4  | 24*1*01 | 2*1*01              | 2*01     | CATSDPLIKGLAEYNEQYF | IGRP β4        | 29/DV5*01       | 53*01    | CAASGGSNYKLT       | IGRP α2                     | 6            | TCRα CDR3 shared with T1D-2 |        |
|                      |         | IGRP265-273_T1D-1_5  | 6*2*01  | 2*7*01              | 1*01     | CASGTLIRGKGYERYF    | IGRP β5        | 29/DV5*01       | 53*01    | CAASGGSNYKLT       | IGRP α2                     | 5            | TCRα CDR3 shared with T1D-2 |        |
|                      |         | IGRP265-273_T1D-1_6  | 3*1*01  | 2*4*01              | 1*01     | CASSQDRWDVMSKNIQYF  | IGRP β1        | 17*01           | 17*01    | CATLCPG#NKLTF      | IGRP α3                     | 4            |                             |        |
|                      |         | IGRP265-273_T1D-1_7  | 3*1*01  | 2*4*01              | 1*01     | CASGDGLAGKITGELFF   | IGRP β6        | 25*01           | 53*01    | CAGLDGSGGSNYKLT    | IGRP α1                     | 3            | TCRα CDR3 shared with T1D-3 |        |
|                      |         | IGRP265-273_T1D-1_8  | 3*1*01  | 2*4*01              | 1*01     | CASSQDRWDVMSKNIQYF  | IGRP β1        | 29/DV5*01       | 54*01    | CAASLLQGAQKLVF     | IGRP α4                     | 2            |                             |        |
|                      |         | IGRP265-273_T1D-1_9  | 19*01   | 1*2*01              | 2*01     | CAKKTSLGPGANYGYTF   | IGRP β7        | 29/DV5*01       | 53*01    | CAASGGSNYKLT       | IGRP α2                     | 2            | TCRα CDR3 shared with T1D-2 |        |
|                      |         | IGRP265-273_T1D-1_10 | 28*01   | 2*7*01              | 1*01     | CASROLIQRSSYEQYF    | IGRP β8        | 29/DV5*01       | 39*01    | CAASDGAGNMLTF      | IGRP α5                     | 2            |                             |        |
|                      |         |                      | 3*1*01  | 2*4*01              | 1*01     | CASSQDRWDVMSKNIQYF  | IGRP β1        | 17*01           | NA       | NA                 |                             | 6            |                             |        |
|                      |         |                      |         |                     |          |                     |                |                 |          |                    |                             |              |                             | Single |
|                      |         | IGRP265-273_T1D-1_11 | 10*3*01 | 1*2*01              | 2*02     | CASSGRFLREGMTYGYTF  | IGRP β9        | 29/DV5*02       | 53*02    | CAASGGSNYKLT       | IGRP α2                     | 1            | TCRα CDR3 shared with T1D-2 |        |
|                      |         | IGRP265-273_T1D-1_12 | 24*1*01 | 2*6*01              | 1*01     | CPLRGLPLFMGGEGP#    | IGRP β10       | 29/DV5*05       | 53*05    | CAASGGSNYKLT       | IGRP α2                     | 1            | TCRα CDR3 shared with T1D-2 |        |
|                      |         | IGRP265-273_T1D-1_13 | 3*1*01  | 2*4*01              | 1*01     | CASSQDRWDVMSKNIQYF  | IGRP β11       | 8*3*01          | 36*01    | CALQTGANLFF        | IGRP α6                     | 1            |                             |        |
| IGRP265-273_T1D-1_14 | 10*3*01 | 1*2*01               | 2*01    | CAISDRFMREMTYGYTF   | IGRP β12 | 29/DV5*01           | 53*01          | VQQAQ#SNYKLT    | IGRP α7  | 1                  |                             |              |                             |        |
| IGRP265-273_T1D-1_15 | 10*3*01 | 2*7*01               | 1*01    | CAISES*GYEQYF       | IGRP β13 | 8*3*01              | 43*01          | CAVGEQNDMRF     | IGRP α8  | 1                  |                             |              |                             |        |
| IGRP265-273_T1D-1_16 | 27*01   | 2*2*01               | 2*01    | CASSDGLAGK#ANTGELFF | IGRP β14 | 17*01               | 17*01          | CATLC#AGNKLT    | IGRP α9  | 1                  |                             |              |                             |        |
| IGRP265-273_T1D-1_17 | 28*01   | 2*7*01               | 2*01    | CASSSVIAGGDYEQNF    | IGRP β15 | 29/DV5*01           | 21*01          | CAASVGSFNKIFYF  | IGRP α10 | 1                  |                             |              |                             |        |
| IGRP265-273_T1D-1_18 | 3*1*01  | 2*4*01               |         | CASRODRWEKMGQNIIRF  | IGRP β16 | 25*01               | 53*01          | CAGLDGSGGSNYKLT | IGRP α1  | 1                  | TCRα CDR3 shared with T1D-3 |              |                             |        |

| Antigen              | Donor   | TCR name (clonotype) | TRBV    | TRBJ                | TRBD     | TCRβ CDR3 sequence  | TCRβ CDR3 name | TRAV                | TRAJ     | TCRα CDR3 sequence | TCRα CDR3 name | Number cells   | Comments                    |          |                             |  |
|----------------------|---------|----------------------|---------|---------------------|----------|---------------------|----------------|---------------------|----------|--------------------|----------------|----------------|-----------------------------|----------|-----------------------------|--|
| IGRP265-273          | T1D-1   | IGRP265-273_T1D-1_19 | 6-5*01  | 2-1*01              | 2*01     | CASSPVLGLDEQFF      | IGRP β17       | 17*01               | 20*01    | CAAFRSNDYKLSF      | IGRP α11       | 1              |                             |          |                             |  |
|                      |         | IGRP265-273_T1D-1_20 | 24-1*01 | 2-1*01              | 1*01     | CATSDLPIYIGTRLNEQFF | IGRP β18       | 8-4*01              | 53*01    | CAVSADSGGSNYKLTFF  | IGRP α12       | 1              |                             |          |                             |  |
|                      |         |                      | NA      | NA                  | NA       | NA                  |                | 29*DV5*01           | 53*01    | CAASGGSNYKLTFF     | IGRP α2        | 1              | TCRα CDR3 shared with T1D-2 |          |                             |  |
|                      |         |                      | NA      | NA                  | NA       | NA                  |                | 25*01               | 53*01    | CAGLGDSGGSNYKLTFF  | IGRP α1        | 1              | TCRα CDR3 shared with T1D-3 |          |                             |  |
|                      |         |                      | 10-3*01 | 1-2*01              | 2*02     | CAISDRFMRXXTNGYYPF  | IGRP β19       | NA                  | NA       | NA                 |                | 1              |                             |          |                             |  |
|                      |         |                      | 27*01   | 2-2*01              | 2*02     | CASGHFLAGKIPXGL#F   | IGRP β20       | NA                  | NA       | NA                 |                | 1              |                             |          |                             |  |
|                      |         |                      | 27*01   | 2-2*01              | 2*01     | CASSDGLAGKREHRG##FF | IGRP β21       | NA                  | NA       | NA                 |                | 1              |                             |          |                             |  |
|                      |         |                      | 28*01   | 2-7*01              | 1*01     | CASRVLIKKSSYF*F     | IGRP β22       | NA                  | NA       | NA                 |                | 1              |                             |          |                             |  |
|                      |         |                      | 27*01   | 2-2*01              | 2*01     | CASSDGLAGK#ANTGELFF | IGRP β14       | NA                  | NA       | NA                 |                | 1              |                             |          |                             |  |
|                      |         |                      | 6-5*01  | 2-3*01              | 2*02     | CASSYVAPRFQDTQ#F    | IGRP β23       | NA                  | NA       | NA                 |                | 1              |                             |          |                             |  |
|                      |         |                      | 3-1*01  | 2-4*01              | 2*01     | CAXGXERWVSVKNIQYF   | IGRP β24       | NA                  | NA       | NA                 |                | 1              |                             |          |                             |  |
|                      |         |                      | 28*01   | 2-7*01              | 1*01     | CASRGLIIQRSSYEYQF   | IGRP β8        | NA                  | NA       | NA                 |                | 1              |                             |          |                             |  |
|                      |         | T1D-2                |         |                     |          |                     |                |                     |          |                    |                |                |                             | Enriched |                             |  |
|                      |         |                      |         | IGRP265-273_T1D-2_1 | 30*01    | 1-2*01              | 1*01           | CAWGVLFIGRVDGYGYTF  | IGRP β25 | 29*DV5*01          | 53*01          | CAASGGSNYKLTFF | IGRP α2                     | 5        | TCRα CDR3 shared with T1D-1 |  |
|                      |         |                      |         | IGRP265-273_T1D-2_2 | 28*01    | 2-7                 | 2*01           | CASGSHHISGGATXR#    | IGRP β26 | 29*DV5*01          | 53*01          | CAASGGSNYKLTFF | IGRP α2                     | 2        | TCRα CDR3 shared with T1D-1 |  |
|                      |         |                      |         | IGRP265-273_T1D-2_3 | 3-1*01   | 1-2*01              | 1*01           | CASSQEVMTALQPDYGYTF | IGRP β27 | 29*DV5*01          | 53*01          | CAASGGSNYKLTFF | IGRP α2                     | 3        | TCRα CDR3 shared with T1D-1 |  |
|                      |         |                      |         |                     | NA       | NA                  | NA             | NA                  |          | 29*DV5*01          | 53*01          | CAASGGSNYKLTFF | IGRP α2                     | 71       | TCRα CDR3 shared with T1D-1 |  |
|                      |         |                      |         |                     |          |                     |                |                     |          |                    |                |                |                             |          | Single                      |  |
|                      |         |                      |         | IGRP265-273_T1D-2_4 | 28*01    | 2-3*01              | 2*01           | CAKSSPXISGITDXRYF   | IGRP β28 | 29*DV5*01          | 53*01          | CAASGGSNYKLTFF | IGRP α2                     | 1        | TCRα CDR3 shared with T1D-1 |  |
|                      |         |                      |         | IGRP265-273_T1D-2_5 | 5-8*01   | 1-2*01              | 1*01           | CASSAVIRGLDMWCYTF   | IGRP β29 | 29*DV5*01          | 53*01          | CAASGGSNYKLTFF | IGRP α2                     | 1        | TCRα CDR3 shared with T1D-1 |  |
| IGRP265-273_T1D-2_6  | 28*01   |                      |         | 2-3*01              | 2*01     | CASSPFFRGIIXDXGYF   | IGRP β30       | 29*DV5*01           | 53*01    | CAASGGSNYKLTFF     | IGRP α2        | 1              | TCRα CDR3 shared with T1D-1 |          |                             |  |
| IGRP265-273_T1D-2_7  | 10-3*01 |                      |         | 1-2*01              | 1*01     | CAISDLITGGDNYGYTF   | IGRP β31       | 29*DV5*01           | 53*01    | CAASGGSNYKLTFF     | IGRP α2        | 1              | TCRα CDR3 shared with T1D-1 |          |                             |  |
| IGRP265-273_T1D-2_8  | 19*01   | 2-7*01               | 2*01    | CASRSSDPYEQYF       | IGRP β32 | 8-1*01              | 34*01          | CAVISYNTDKLIF       | IGRP α13 | 1                  |                |                |                             |          |                             |  |
| IGRP265-273_T1D-2_9  | 6-1*01  | 1-2*01               | 1*01    | CASSEVNRGNGYTF      | IGRP β33 | 26-1*01             | 37*02          | CISP*SGSNTGKLIFF    | IGRP α14 | 1                  |                |                |                             |          |                             |  |
| IGRP265-273_T1D-2_10 | 6-1*01  | 1-2*01               | 2*02    | CASSPRXKANYGYTF     | IGRP β34 | 3*01                | 26*01          | CAVRDFSDNYGQNFVF    | IGRP α15 | 1                  |                |                |                             |          |                             |  |
| IGRP265-273_T1D-2_11 | 4-2*01  | 2-2*01               | 2*02    | CASSQGVIESGELFF     | IGRP β35 | 26-1*01             | 39*01          | CIXXL*NDIGENMFLI    | IGRP α16 | 1                  |                |                |                             |          |                             |  |
| IGRP265-273_T1D-2_12 | 5-8*01  | 1-2*01               | 1*01    | CASSSAVIRGLDGGYTF   | IGRP β36 | 26-1*01             | 29*01          | CIVRVA#SGNTPLVF     | IGRP α17 | 1                  |                |                |                             |          |                             |  |
|                      | 27*01   | 1-6*02               | 1*01    | CASNTGLRFTFP#F      | IGRP β37 | NA                  | NA             | NA                  |          | 1                  |                |                |                             |          |                             |  |
|                      | 2*01    | 1-5*01               | 1*01    | CASSEGAIGPQHF       | IGRP β38 | NA                  | NA             | NA                  |          | 1                  |                |                |                             |          |                             |  |
|                      | 7-8*01  | 2-7*01               | 1*01    | CASSLGDNGGYEQYF     | IGRP β39 | NA                  | NA             | NA                  |          | 1                  |                |                |                             |          |                             |  |
|                      | 28*01   | 1-5*01               | 2*01    | CASSLFSXGGGXQPQHF   | IGRP β40 | NA                  | NA             | NA                  |          | 1                  |                |                |                             |          |                             |  |
|                      | 12-3*01 | 1-2*01               | 1*01    | CASSLWVAGNGSTF      | IGRP β41 | NA                  | NA             | NA                  |          | 1                  |                |                |                             |          |                             |  |
|                      | 4-2*01  | 2-2*01               | 2*02    | CASSQDPGXGELFF      | IGRP β42 | NA                  | NA             | NA                  |          | 1                  |                |                |                             |          |                             |  |
|                      | 28*01   | 2-7*01               | 2*01    | CASSSHHISGGXTSR#F   | IGRP β43 | NA                  | NA             | NA                  |          | 1                  |                |                |                             |          |                             |  |
|                      | 28*01   | 2-3*01               | 1*01    | CASSPFFHIEIXDTQXF   | IGRP β44 | NA                  | NA             | NA                  |          | 1                  |                |                |                             |          |                             |  |
| T1D-3                |         |                      |         |                     |          |                     |                |                     |          |                    |                | Enriched       |                             |          |                             |  |
|                      |         | IGRP265-273_T1D-3_1  | 3-1*01  | 2-2*01              | 1*01     | CASSQDHRVMDLADGELFF | IGRP β45       | 25*01               | 53*01    | CAGLGDSGGSNYKLTFF  | IGRP α1        | 20             | TCRα CDR3 shared with T1D-1 |          |                             |  |
|                      |         |                      | NA      | NA                  | NA       | NA                  |                | 26-1*03             | 54*01    | CIAQGAQKLVF        | IGRP α18       | 7              |                             |          |                             |  |
|                      |         |                      | 3-1*01  | 2-2*01              | 1*01     | CASSQDHRVMDLADGELFF | IGRP β45       | NA                  | NA       | NA                 |                | 23             |                             |          |                             |  |
|                      |         |                      |         |                     |          |                     |                |                     |          |                    |                |                | Single                      |          |                             |  |
|                      |         | IGRP265-273_DM3_2    | 6-1*01  | 2-7*01              | 1*01     | CAIWKRV#YEYQYF      | IGRP β46       | 8-6*02              | 13*02    | CAVTRW#GGYQVTF     | IGRP α19       | 1              |                             |          |                             |  |
|                      |         | IGRP265-273_DM3_3    | 7-8*01  | 2-5*01              | 1*01     | CASRIWYIRNEETQYF    | IGRP β47       | 25*01               | 47*02    | CAG#YGNKLVF        | IGRP α20       | 1              |                             |          |                             |  |
|                      |         | IGRP265-273_DM3_4    | 29-1*01 | 1-2*01              | 1*01     | CSVPTGEGYGYTF       | IGRP β48       | 35*01               | 28*01    | CAXSGGGSYQLTF      | IGRP α21       | 1              |                             |          |                             |  |
|                      |         | IGRP265-273_DM3_5    | 5-6*01  | 2-7*01              | 1*01     | CASSLDRAIGVTYEQYF   | IGRP β49       | 8-2*01              | 32*02    | CVVSDGYGGATNKLIF   | IGRP α22       | 1              |                             |          |                             |  |
|                      |         | IGRP265-273_DM3_6    | 5-6*01  | 2-1*01              | 2*01     | CASSYGLAEQFF        | IGRP β50       | 8-6*02              | 21*01    | CALPP#YFNKFF       | IGRP α23       | 1              |                             |          |                             |  |
| IGRP265-273_DM3_7    | 20-1*01 | 2-6*01               | 1*01    | CSASASLTSGANVLTFF   | IGRP β51 | 26-1*01             | 54*01          | CIAQGAQKLVF         | IGRP α18 | 1                  |                |                |                             |          |                             |  |
| IGRP265-273_DM3_8    | 6-1*01  | 2-1*01               | 2*01    | CARRSRGENNGGVF      | IGRP β52 | 27*01               | 23*01          | CAGGLIYNQEGKLIFF    | IGRP α24 | 1                  |                |                |                             |          |                             |  |
| IGRP265-273_DM3_9    | 6-6*01  | 2-7*01               | NA      | CASSYQHEQYF         | IGRP β53 | 8-3*01              | 45*01          | CAGRLVYGGADALTF     | IGRP α25 | 1                  |                |                |                             |          |                             |  |
|                      | NA      | NA                   | NA      | NA                  |          | 4*01                | 42*01          | CLAGEWYGGSQGNLIF    | IGRP α26 | 1                  |                |                |                             |          |                             |  |
|                      | NA      | NA                   | NA      | NA                  |          | 26-1*01             | 39*01          | CIVRVAMGAGNMLTF     | IGRP α27 | 1                  |                |                |                             |          |                             |  |
|                      | NA      | NA                   | NA      | NA                  |          | 17*01               | 45*01          | CATDGAAGDGLTF       | IGRP α28 | 1                  |                |                |                             |          |                             |  |
|                      | NA      | NA                   | NA      | NA                  |          | 8-4*05              | 39*01          | CVVSLNAGNMLTF       | IGRP α29 | 1                  |                |                |                             |          |                             |  |
|                      | 2*01    | 1-5*01               | 2*01    | CASSDGGGGQPXF       | IGRP β54 | NA                  | NA             | NA                  |          | 1                  |                |                |                             |          |                             |  |
|                      | 6-1*01  | 2-2*01               | 1*01    | CASSEDRTGELFF       | IGRP β55 | NA                  | NA             | NA                  |          | 1                  |                |                |                             |          |                             |  |
|                      | 6-2*01  | 2-1*01               | 1*01    | CASSLGRINEQFF       | IGRP β56 | NA                  | NA             | NA                  |          | 1                  |                |                |                             |          |                             |  |
|                      | 4-1*01  | 2-7*01               | 1*01    | CAXGKKGTPX##F       | IGRP β57 | NA                  | NA             | NA                  |          | 1                  |                |                |                             |          |                             |  |
|                      | 19*01   | 1-2*01               | 2*01    | FLGARMXGKMLTINTP#   | IGRP β58 | NA                  | NA             | NA                  |          | 1                  |                |                |                             |          |                             |  |
|                      | 6-5*01  | 1-1*01               | 1*01    | CAIREDSVFFF         | IGRP β59 | NA                  | NA             | NA                  |          | 1                  |                |                |                             |          |                             |  |
|                      | 28*01   | 1-4*01               | 1*01    | CASRPITGLKLF        | IGRP β60 | NA                  | NA             | NA                  |          | 1                  |                |                |                             |          |                             |  |
|                      | 3-1*01  | 2-3*01               | 1*01    | CASSHGKTXF          | IGRP β61 | NA                  | NA             | NA                  |          | 1                  |                |                |                             |          |                             |  |
|                      | 12-3*01 | 2-2*01               | 2*01    | CASSLGGGLFF         | IGRP β62 | NA                  | NA             | NA                  |          | 1                  |                |                |                             |          |                             |  |
|                      | 4-2*01  | 2-6*01               | 1*01    | CASSQROGSGANVLTFF   | IGRP β63 | NA                  | NA             | NA                  |          | 1                  |                |                |                             |          |                             |  |
|                      | 20-1*01 | 2-7*01               | 1*01    | CSARGSSYEQYF        | IGRP β64 | NA                  | NA             | NA                  |          | 1                  |                |                |                             |          |                             |  |
|                      | 27*01   | 2-3*01               | 2*01    | CARSRGXKTXQ#F       | IGRP β65 | NA                  | NA             | NA                  |          | 1                  |                |                |                             |          |                             |  |
|                      | 4-2*01  | 2-7*01               | 2*01    | CASXPRESSEXRF       | IGRP β66 | NA                  | NA             | NA                  |          | 1                  |                |                |                             |          |                             |  |
| T1D-4                |         |                      |         |                     |          |                     |                |                     |          |                    |                | Single         |                             |          |                             |  |
|                      |         | IGRP265-273_T1D-4_1  | 6-5*01  | 2-2*01              | 1*01     | CASVGPYGTGELFF      | IGRP β67       | 8-2*01              | 48*01    | CAVS#SNFNGEKLTF    | IGRP α30       | 1              |                             |          |                             |  |
|                      |         | IGRP265-273_T1D-4_2  | 27*01   | 2-4*01              | 1*01     | CASREGSYPKNIQYF     | IGRP β68       | 8-6*01              | 29*01    | CKAPLVF            | IGRP α31       | 1              |                             |          |                             |  |
|                      |         |                      | NA      | NA                  | NA       | NA                  |                | 3*01                | 31*01    | CAVRLGGARLMF       | IGRP α32       | 1              |                             |          |                             |  |
|                      | NA      | NA                   | NA      | NA                  |          | 2*01                | 12*01          | VL*#DSSYLKIF        | IGRP α33 | 1                  |                |                |                             |          |                             |  |

| Antigen     | Donor                | TCR name (clonotype) | TRBV    | TRBJ        | TRBD                | TCRβ CDR3 sequence | TCRβ CDR3 name | TRAV      | TRAJ             | TCRα CDR3 sequence | TCRα CDR3 name | Number cells | Comments |        |
|-------------|----------------------|----------------------|---------|-------------|---------------------|--------------------|----------------|-----------|------------------|--------------------|----------------|--------------|----------|--------|
| IGRP265-273 | T1D-4                |                      | 4-1*01  | 2-3*01      | 1*01                | CARXGAXRXE*PXX     | IGRP β69       | NA        | NA               | NA                 |                | 1            |          |        |
|             |                      |                      | 4-1*01  | 1-1*01      | 1*01                | CASPRFGEXAR*LLS#FF | IGRP β70       | NA        | NA               | NA                 |                | 1            |          |        |
|             |                      |                      | 6-1*01  | 1-6*02      | 2*01                | CASRGGGSPLHF       | IGRP β71       | NA        | NA               | NA                 |                | 1            |          |        |
|             |                      |                      | 5-5*01  | 1-2*01      | 1*01                | CASSLTGTASTYGYTF   | IGRP β72       | NA        | NA               | NA                 |                | 1            |          |        |
|             |                      | 27*01                | 1-1*01  | 2*02        | VPPVCV*GGTLKLF#     | IGRP β73           | NA             | NA        | NA               |                    | 1              |              |          |        |
|             | T1D-5                |                      |         |             |                     |                    |                |           |                  |                    |                |              |          | Single |
|             |                      | IGRP265-273_T1D-5_1  | 12-3*01 | 1-1*01      | 1*01                | CASSWETEAEFF       | IGRP β74       | 8-1*01    | 9*01             | CAVMAPHTGGFKTIF    | IGRP α34       |              | 1        |        |
|             |                      | IGRP265-273_T1D-5_2  | 6-5*01  | 2-3*01      | 2*01                | CASSYSGGNRKNTQNF   | IGRP β75       | 29/DV5*01 | 52*01            | CAASASGGTSYGKLTIF  | IGRP α35       |              | 1        |        |
|             |                      | IGRP265-273_T1D-5_3  | 12-3*01 | 1-2*01      | 2*01                | FASRLGGSYX*TF      | IGRP β76       | 36/DV7*02 | 42*01            | CAAMNYGGSQGNLIF    | IGRP α36       |              | 1        |        |
|             |                      |                      | NA      | NA          | NA                  | NA                 |                | 8-1*01    | 43*01            | CAVLMDNDMRF        | IGRP α37       |              | 1        |        |
|             |                      | NA                   | NA      | NA          | NA                  |                    | 8-2*01         | 33*01     | CAVTRNPGDSNYQLIW | IGRP α38           |                | 1            |          |        |
|             |                      | 6-2*01               | 2-1*01  | 2*01        | CASCSTSFNEQFF       | IGRP β77           | NA             | NA        | NA               |                    |                | 1            |          |        |
|             |                      | 2*01                 | 1-2*01  | 2*01        | CASSDSIG*WLW##F     | IGRP β78           | NA             | NA        | NA               |                    |                | 1            |          |        |
|             |                      | 6-2*01               | 2-7*01  | 2*01        | CASSNRXSFYERYF      | IGRP β79           | NA             | NA        | NA               |                    |                | 1            |          |        |
| T1D-12      |                      |                      |         | NA          | NA                  | NA                 | NA             |           | 3*01             | 22*01              | CADS#ARQLTF    | IGRP α39     | 1        |        |
|             |                      |                      | NA      | NA          | NA                  | NA                 |                | 8-4*04    | 17*01            | CAVSEIKAAGNKLTIF   | IGRP α40       | 1            |          |        |
|             |                      |                      | NA      | NA          | NA                  | NA                 |                | 41*01     | 42*01            | CAVAAGYGGSQGNLIF   | IGRP α41       | 1            |          |        |
|             |                      | 7-9*01               | 2-3*01  | 1*01        | CASSLILGAPDTX#F     | IGRP β80           | NA             | NA        | NA               |                    |                | 1            |          |        |
| T1D-13      |                      |                      |         |             |                     |                    |                |           |                  |                    |                |              | Single   |        |
|             |                      | 29-1*01              | 2-3*01  | 2*01 F      | CSPTGLRDTQYF        | IGRP β81           | NA             | NA        | NA               |                    |                | 1            |          |        |
| T1D RO-3    |                      |                      | 29-1*01 | 2-7*01      | 1*01 F              | CSVESMDRNYEQYF     | IGRP β82       | NA        | NA               | NA                 |                | 1            |          |        |
|             |                      |                      |         |             |                     |                    |                |           |                  |                    |                |              | Single   |        |
|             | IGRP265-273_ROTDM1_1 | 28*01                | 2-1*01  | 2*01        | CASSPITGTSLANEQFF   | IGRP β83           | 12-1*01        | 11*01     | CVVKRGYSTLTF     | IGRP α42           |                | 1            |          |        |
|             | IGRP265-273_ROTDM1_2 | 6-2*01               | 2-7*01  | 2*01        | FXGSPGTGGGKXYF      | IGRP β84           | 6*03           | 11*01     | CALRGGYSTLTF     | IGRP α43           |                | 1            |          |        |
|             |                      | NA                   | NA      | NA          | NA                  |                    | 25*01          | 15*01     | CAGPVHQAGTALIF   | IGRP α44           |                | 1            |          |        |
|             |                      | NA                   | NA      | NA          | NA                  |                    | 12-1*01        | 31*01     | CVGGNARLMF       | IGRP α45           |                | 1            |          |        |
| HC5         |                      |                      |         |             |                     |                    |                |           |                  |                    |                |              | Single   |        |
|             | IGRP265-273_HC5_1    | 10-3*01              | 1-1*01  | 2*02        | CAIRGEGNTEAFF       | IGRP β86           | 29/DV5*01      | 40*01     | CAASGXGTYKYIF    | IGRP α46           |                | 1            |          |        |
|             |                      | NA                   | NA      | NA          | NA                  |                    | 3*01           | 34*01     | CAVRAYLSYNTDKLIF | IGRP α47           |                | 1            |          |        |
|             |                      | 2*01                 | 1-2*01  | 2*02        | CASPGGGTYGYGYPF     | IGRP β87           | NA             | NA        | NA               |                    |                | 1            |          |        |
| HC8         |                      |                      |         |             |                     |                    |                |           |                  |                    |                |              | Single   |        |
|             | IGRP265-273_HC8_1    | 10-3*01              | 2-7*01  | 2*01        | CAISDWSTYEQYF       | IGRP β89           | 29/DV5*01      | 34*01     | CAARVENNTAKLIF   | IGRP α48           |                | 1            |          |        |
|             | IGRP265-273_HC8_2    | 28*01                | 2-1*01  | 1*01        | CASSLVGGXRRRSYTGQVF | IGRP β90           | 6*05           | 45*01     | CALGGYSGGGADGLTF | IGRP α49           |                | 1            |          |        |
|             |                      | NA                   | NA      | NA          | NA                  |                    | 29/DV5*01      | 48*01     | CAASDNFGNEKLTIF  | IGRP α50           |                | 1            |          |        |
|             |                      | NA                   | NA      | NA          | NA                  |                    | 25*01          | 48*01     | CAGPRSNFGNEKLTIF | IGRP α51           |                | 1            |          |        |
|             |                      | 2*01                 | 1-2*01  | NA          | CASRXSANYGYTF       | IGRP β91           | NA             | NA        | NA               |                    |                | 1            |          |        |
|             |                      | 27*01                | 2-7*01  | 1*01        | CASSLSWGYEQYF       | IGRP β92           | NA             | NA        | NA               |                    |                | 1            |          |        |
|             |                      | 14*01                | 1-1*01  | NA          | CASSPRRQSLNTEAFF    | IGRP β93           | NA             | NA        | NA               |                    |                | 1            |          |        |
|             |                      | 10-3*01              | 2-7*01  | 1*01        | CATSGTGYEQYF        | IGRP β94           | NA             | NA        | NA               |                    |                | 1            |          |        |
|             | HC9                  |                      |         |             |                     |                    |                |           |                  |                    |                |              |          | Single |
|             |                      | NA                   | NA      | NA          | NA                  |                    | 29/DV5*01      | 53*01     | CAASGSSNYHLSF    | IGRP α52           |                | 1            |          |        |
|             |                      | NA                   | NA      | NA          | NA                  |                    | 29/DV5*01      | 29*01     | CAASPPSGNTPLVF   | IGRP α53           |                | 1            |          |        |
| HC10        |                      |                      |         |             |                     |                    |                |           |                  |                    |                |              | Single   |        |
|             |                      | 3-1*01               | 2-7*01  | NA          | CASRPLETEYDQPL      | IGRP β95           | NA             | NA        | NA               |                    |                | 1            |          |        |
|             |                      | NA                   | NA      | NA          | NA                  |                    | 29/DV5*01      | 13*02     | VILGV#QKVTF      | IGRP α54           |                | 1            |          |        |
|             |                      | NA                   | NA      | NA          | NA                  |                    | 25*01          | 37*02     | CAGTPSNTGKLIF    | IGRP α55           |                | 1            |          |        |
|             | 6-1*01               | 2-1*01               |         | CASSEFNEQFF | IGRP β96            | NA                 | NA             | NA        |                  |                    | 1              |              |          |        |

**Supplementary Table S2: Overview of samples used in the study.**

| Sample group                         | N  | Sex (m/f) | Median age, y (range) | Median time after onset, y (range) | Figure(s) with data |
|--------------------------------------|----|-----------|-----------------------|------------------------------------|---------------------|
| <b>Frequency and single cell TCR</b> |    |           |                       |                                    |                     |
| TCR analysis (Flu)                   | 4  | 4/-       | 54 (31.2-63.0)        |                                    | Fig. S1             |
| Recent onset type 1 diabetes*        | 6  | 4/2       | 9.5 (7.4-10.2)        | 0.02 (0.01-0.04)                   | Fig.1               |
| Healthy control children             | 8  | 4/4       | 10.5 (7.3-10.8)       |                                    | Fig.1               |
| Type 1 diabetes (>1 y duration)      | 13 | 4/9       | 34.4 (23.3-45.9)      | 14.3 (1.1-41.5)                    | Fig.1, Fig S2       |
| Healthy (adult)                      | 10 | 4/6       | 47.4 (24.0-60.0)      |                                    | Fig. S2             |
| <b>TCR<math>\alpha</math> NGS</b>    |    |           |                       |                                    |                     |
| Healthy control adolescents          | 14 | 4/10      | 13.9 (11.7-16.5)      |                                    | Fig.3, Fig. S5      |
| Islet autoantibody positive          | 13 | 10/3      | 11.6 (3.9-18.7)       |                                    | Fig.3, Fig. S5      |
| Recent onset type 1 diabetes*        | 8  | 3/5       | 19.4 (5.3-22.9)       | 0.4 (0.04-0.93)                    | Fig.3, Fig. S5      |

\*No overlap between patients

**Supplementary Table S3: TCR gene usage and CDR3 sequence information of CD8<sup>+</sup> T cell clones**

| Antigen                 | Clone name            | TRBV    | TRBJ   | TRBD | TCR $\beta$ CDR3 sequence | TRAV      | TRAJ  | TCR $\alpha$ CDR3 sequence |
|-------------------------|-----------------------|---------|--------|------|---------------------------|-----------|-------|----------------------------|
| FluMP <sub>58-66</sub>  | clone 7               | 6-1*01  | 1-5*01 | 1*01 | CASSDFQAINQPQHF           | 27*01     | 23*01 | CAGGLTYNQGGKLIF            |
| IGRP <sub>265-273</sub> | clone 16 and clone 17 | 3-1*01  | 2-4*01 | 1*01 | CASSQDRWDVMSKNIQYF        | 25*01     | 53*01 | CAGLGDSGGSNYKLTF           |
| IGRP <sub>265-273</sub> | clone 22 and clone 27 | 10-3*01 | 1-2*01 | 2*02 | CAISDRFMREGMTYGYTF        | 29/DV5*01 | 53*01 | CAASGGSNYKLTF              |



## Supplementary Methods

### *Gene expression profiling*

Gene expression profiles on single cells were examined as previously described<sup>6</sup> with some modifications. cDNA was synthesized with Quanta qScript™ cDNA Supermix directly on cells. Total cDNA was pre-amplified for 16 cycles (1x 95°C 8', 95°C 45'', 49°C with 0.3°C increment/cycle 1', 72°C 1.5') and 1x 72°C 7' with the TATAA GrandMaster Mix (TATAA Biocenter, Göteborg, Sweden) in a final volume of 35 µl in the presence of primer pairs for the following genes: *CD52, CCL4, FASLG, IL7R, IFNG, CD3E, E2F1, PDCD1, TNF, PRF1, CCR7, GATA3, CCL5, IL10, IL21, GZMA, REL, EOMES, IL17F, GZMB, RGS16, TBX21, GZMH, TNFSF10, LAG3* (25nM final for each primer, see list below for primer details). Pre-amplified cDNA (10 µl) was then treated with 1.2 U Exonuclease I and expression quantified by real time PCR on the BioMark™ HD System (© Fluidigm Corporation, CA, USA) using the 96.96 Dynamic Array IFC and the GE 96x96 Fast PCR+ Melt protocol and SsoFast EvaGreen Supermix with Low ROX (BIO RAD, CA, USA) with 5 µM primers for each assay. Raw data was analyzed using the Fluidigm Real-Time PCR analysis software. Pre-processing and data analysis was conducted using KNIME 2.11.2 and RStudio Version 0.99.486 (Boston, MA, USA). Pre-processing via a linear model to correct for confounding sampling effects was conducted as previously described<sup>6</sup>. To model the bi-modal gene expression of single cells from T cell clones, the Hurdle model, a semi-continuous modeling framework, was applied to the pre-processed data<sup>7</sup>. This allowed us to assess the differential expression profiles with respect to the frequency of expression and the positive expression mean via a likelihood ratio test.

## Primers used for gene expression profiling

| Gene           | Primer preamplification 5' | Primer preamplification 3' | Primer qPCR 5'            | Primer qPCR 3'            |
|----------------|----------------------------|----------------------------|---------------------------|---------------------------|
| <b>GZMH</b>    | CAGCCATTCTCTC<br>CTCCTGT   | GAGCAGCTGTCA<br>GCACAAAG   | TCCTCCTGTTGGC<br>CTTTCTT  | GAGCAGCTGTCAG<br>CACAAAG  |
| <b>TBX21</b>   | CCGTGACTGCCT<br>ACCAGAAT   | ATCTCCCCCAAG<br>GAATTGAC   | CCGTGACTGCCTA<br>CCAGAAT  | ATCTCCCCCAAGG<br>AATTGAC  |
| <b>CD52</b>    | GCGCTTCCTCTT<br>CCTCCTAC   | CTGAAGCAGAAG<br>AGGTGGATT  | GCGCTTCCTCTTC<br>CTCCTAC  | CTGAAGCAGAAGA<br>GGTGGATT |
| <b>TNF</b>     | CCCAGGGACCT<br>CTCTCTAA    | TGAGGTACAGGC<br>CCTCTGAT   | CCCAGTGACAAG<br>CCTGTAG   | TGAGGTACAGGCC<br>CTCTGAT  |
| <b>IL7R</b>    | GGAGCCAATGAC<br>TTTGTGGT   | CTGCAGGAGTGT<br>CAGCTTTG   | GGAGCCAATGACT<br>TTGTGGT  | CTGCAGGAGTGT<br>AGCTTTG   |
| <b>CCL4</b>    | CTGTCCTGTCTCT<br>CCTCATGC  | GCTTGCTTCTTTT<br>GGTTTGG   | TAGCTGCCTTCTG<br>CTCTCCA  | GCTTGCTTCTTTG<br>GTTTGG   |
| <b>EOMES</b>   | CACAAATACCAA<br>CCCCGACT   | GGGACAATCTGA<br>TGGGATGA   | CACAAATACCAAC<br>CCCCGACT | GGGACAATCTGAT<br>GGGATGA  |
| <b>TNFSF10</b> | GACAGACCTGCG<br>TGCTGAT    | CAGCAGGGGCTG<br>TTCATACT   | CCTGCAGTCTCTC<br>TGTGTGG  | CAGCAGGGGCTGT<br>TCATACT  |
| <b>CD3E</b>    | GCACTCACTGGA<br>GAGTTCTGG  | CCTCATCACCGC<br>CTATGTTT   | GCACTCACTGGAG<br>AGTTCTGG | CCTCATCACCGCC<br>TATGTTT  |
| <b>E2F1</b>    | GCCATCCAGGAA<br>AAGGTGT    | TCTGCACCTTCA<br>GCACCTC    | GCCATCCAGGAAA<br>AGGTGT   | TCTGCACCTTCA<br>CACCTC    |
| <b>GZMA</b>    | TGCAAAAGACTG<br>GGTGTGGA   | TTTTTGCTTTTTT<br>CATCAGC   | TGCAAAAGACTGG<br>GTGTTGA  | TTTTTGCTTTTTCC<br>ATCAGC  |
| <b>GZMB</b>    | GGTGGCTTCCTG<br>ATACGAGA   | GCTGCAGTAGCA<br>TGATGTCCG  | ACTGTTGGGGAAG<br>CTCCATA  | GCTGCAGTAGCAT<br>GATGTCCG |
| <b>IL21</b>    | TCGCCACATGAT<br>TAGAATGC   | AAGCAGGAAAAA<br>GCTGACCA   | TCGCCACATGATT<br>AGAATGC  | AAGCAGGAAAAAG<br>CTGACCA  |
| <b>IFNG</b>    | CTGTTACTGCCA<br>GGACCCAT   | TGGATGCTCTGG<br>TCATCTTT   | GGTCATTCAGATG<br>TAGCGGA  | TGGATGCTCTGGT<br>CATCTTT  |
| <b>LAG3</b>    | ATCACCCTTAG<br>CGAAAGC     | CTTGGCAGTGAG<br>GAAAGACC   | ATCACCCTTAGC<br>GGAAAGC   | CTTGGCAGTGAGG<br>AAAGACC  |
| <b>PDCD1</b>   | GCTTCCGTGTCA<br>CACAACCTG  | GCACTTCTGCC<br>TTCTCTCT    | GCTTCCGTGTCA<br>ACAACCTG  | GCACTTCTGCCCT<br>TCTCTCT  |
| <b>PRF1</b>    | AACTTTGCAGCC<br>CAGAAGAC   | GGGTGCCGTAGT<br>TGGAGATA   | ACAGCTTCAGCAC<br>TGACACG  | GGGTGCCGTAGTT<br>GGAGATA  |
| <b>CCL5</b>    | CGCTGTCATCCT<br>CATTGCTA   | ACACACTTGGCG<br>GTTCTTTC   | ATCTGCCTCCCCA<br>TATTCT   | ACACACTTGGCGG<br>TTCCTTTC |
| <b>REL</b>     | ACAAATGTGAAG<br>GGCGATCA   | CCGTCTCTGCAG<br>TCTTTTCC   | GGAGCACAGCACA<br>GACAACA  | CCGTCTCTGCAGT<br>CTTTTCC  |
| <b>RGS16</b>   | CACGCTTTCCTG<br>AAGACAGA   | GACCTCTTTAGG<br>GGCCTCAC   | CACGCTTTCCTGA<br>AGACAGA  | GACCTCTTTAGGG<br>GCCTCAC  |
| <b>FASLG</b>   | GGGATGTTTCAG<br>CTTTCCA    | CAGAGGCATGGA<br>CCTTGAGT   | CAGAAGGAGCTG<br>GCAGAACT  | CAGAGGCATGGAC<br>CTTGAGT  |
| <b>IL17F</b>   | TCCAAAAGCCTG<br>AGAGTTGC   | ATGCAGCCCAAG<br>TTCCTACA   | GCCTGTGCCAGGA<br>GGTAGTA  | ATGCAGCCCAAGT<br>TTCCTACA |
| <b>IL10</b>    | TGCTGGAGGACT<br>TTAAGGGTTA | GCCTTGCTCTTG<br>TTTTACAG   | TTTAAGGGTTACC<br>TGGGTTGC | GCCTTGCTCTTGTT<br>TTACAG  |
| <b>GATA3</b>   | CCGCCCTACTAC<br>GGAAACTC   | TTGGAGAAGGGG<br>CTGAGAT    | CCGCCCTACTACG<br>GAAACTC  | TTGGAGAAGGGGC<br>TGAGAT   |
| <b>CCR7</b>    | CAATGAAAAGCG<br>TGCTGGT    | ATAGGGAGGAAC<br>CAGGCTTT   | GTGGTGGCTCTCC<br>TTGTCAT  | ATAGGGAGGAACC<br>AGGCTTT  |

## References

- 1 Valkenburg, S. A. *et al.* Molecular basis for universal HLA-A\*0201-restricted CD8+ T-cell immunity against influenza viruses. *Proceedings of the National Academy of Sciences of the United States of America* **113**, 4440-4445, doi:10.1073/pnas.1603106113 (2016).
- 2 Gil, A., Yassai, M. B., Naumov, Y. N. & Selin, L. K. Narrowing of human influenza A virus-specific T cell receptor alpha and beta repertoires with increasing age. *Journal of virology* **89**, 4102-4116, doi:10.1128/JVI.03020-14 (2015).
- 3 Naumov, Y. N. *et al.* Multiple glycines in TCR alpha-chains determine clonally diverse nature of human T cell memory to influenza A virus. *J Immunol* **181**, 7407-7419 (2008).
- 4 Lehner, P. J. *et al.* Human HLA-A0201-restricted cytotoxic T lymphocyte recognition of influenza A is dominated by T cells bearing the V beta 17 gene segment. *The Journal of experimental medicine* **181**, 79-91 (1995).
- 5 Naumov, Y. N., Hogan, K. T., Naumova, E. N., Pagel, J. T. & Gorski, J. A class I MHC-restricted recall response to a viral peptide is highly polyclonal despite stringent CDR3 selection: implications for establishing memory T cell repertoires in "real-world" conditions. *J Immunol* **160**, 2842-2852 (1998).
- 6 Bonifacio, E. *et al.* Effects of high-dose oral insulin on immune responses in children at high risk for type 1 diabetes: the Pre-POINT randomized clinical trial. *Jama* **313**, 1541-1549, doi:10.1001/jama.2015.2928 (2015).
- 7 McDavid, A. *et al.* Modeling bi-modality improves characterization of cell cycle on gene expression in single cells. *PLoS computational biology* **10**, e1003696, doi:10.1371/journal.pcbi.1003696 (2014).
